# Supplementary material for: Unveiling IL-33/ST2 Pathway Unbalance in Cardiac Remodeling Due to Obesity in Zucker Fatty Rats
Source: MDPI journal article supplement (doi:10.3390/ijms24031991), 2023-01-19
Supplement: s1 [file s1]

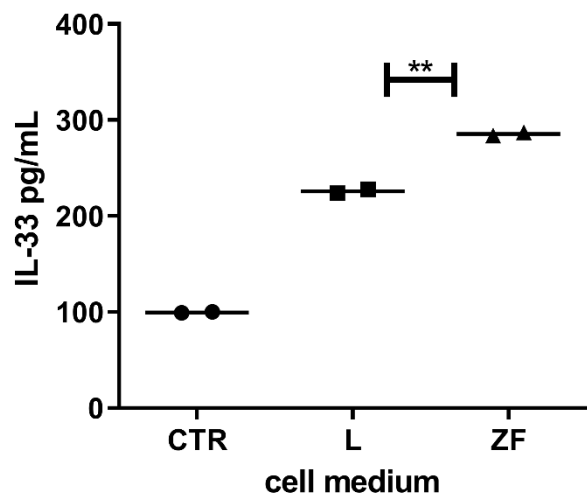

Supplementary Fig S1: characterization of VAT secretome. Conditioned medium from VAT tissue from obese rats contained higher levels of IL-33 protein as measured through ELISA,  $p = \text{Student's t-test: } ** p < 0.01$ .

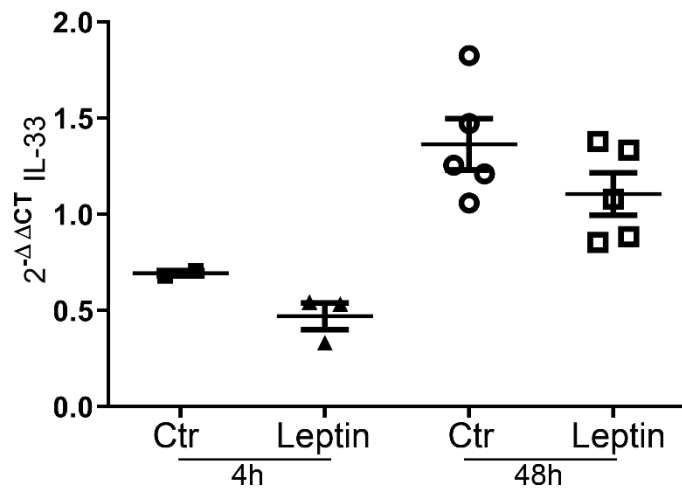

Supplementary Fig S2: Leptin *in vitro* treatment of H9C2 cells modulated IL-33/ST2 signaling. Graphs showed qPCR of H9C2 cell treated with leptin or vector at 4 or 48h. Leptin treatment reduced *IL-33*. Student's t-test: \*  $p < 0.05$ ; \*\*  $p < 0.01$ , \*\*\*  $p < 0.001$ .
